# Supplementary material for: Cation localization and movement within DNA thrombin binding aptamer in solution
Source: Royal Society of Chemistry journal article supplement (doi:10.1039/b914783g), 2009-01-01
Supplement: b914783g.pdf [file b914783g.pdf]

## Cation localization and movement within DNA thrombin binding aptamer in solution

Marko Trajkovski,<sup>a</sup> Primož Šket,<sup>a</sup> and Janez Plavec,<sup>\*,a,b</sup>

<sup>a</sup> Slovenian NMR Centre, National Institute of Chemistry, Hajdrihova 19, SI-1000 Ljubljana, Slovenia

<sup>b</sup> Faculty of Chemistry and Chemical Technology, University of Ljubljana, SI-1000 Ljubljana, Slovenia

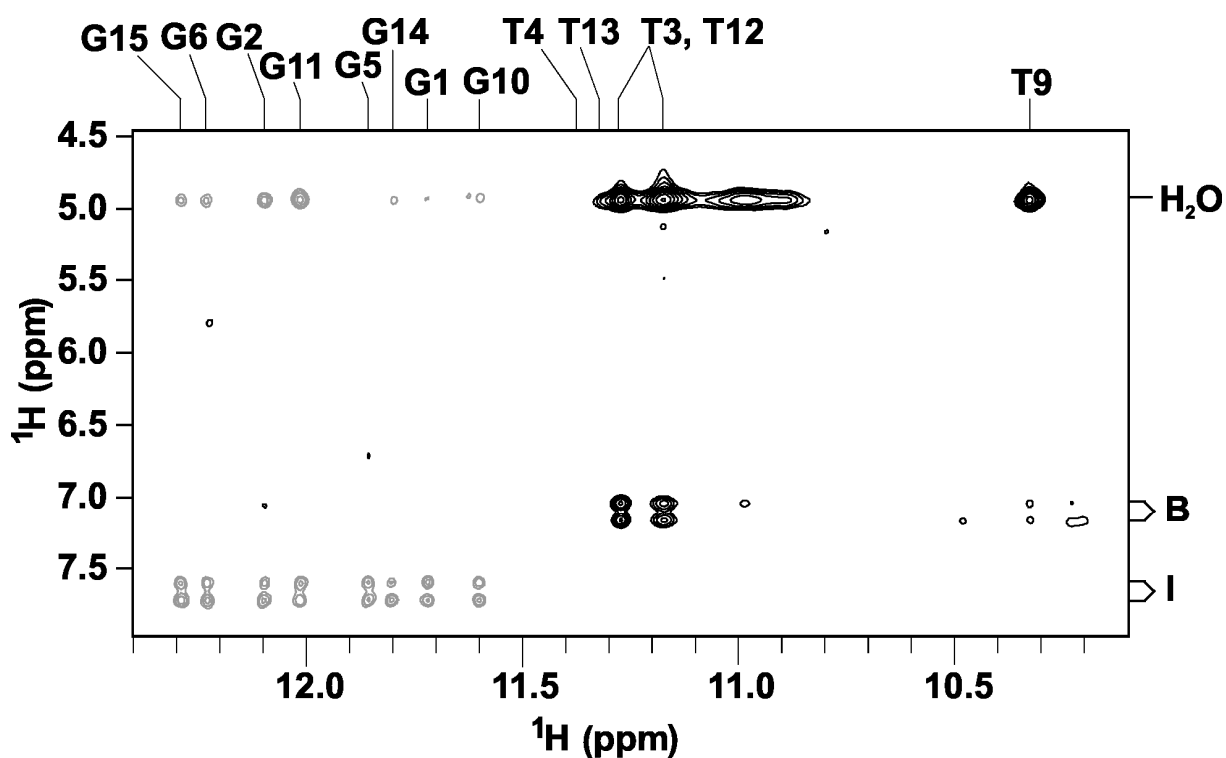

**Figure S1.** Region of ROESY spectrum of TBA with mixing time of 40 ms in the presence of 36 mM  $^{15}\text{NH}_4\text{Cl}$  in 5%  $^2\text{H}_2\text{O}$  at 5 °C and pH 4.5. The oligonucleotide concentration was 1.8 mM. Nitrogen-15 has not been decoupled along f1 dimension. Imino proton assignments are shown on the top, while resonance positions of water, ammonium ions in bulk solution (**B**) and at the inner binding site (**I**) are indicated on the right side of the spectrum.

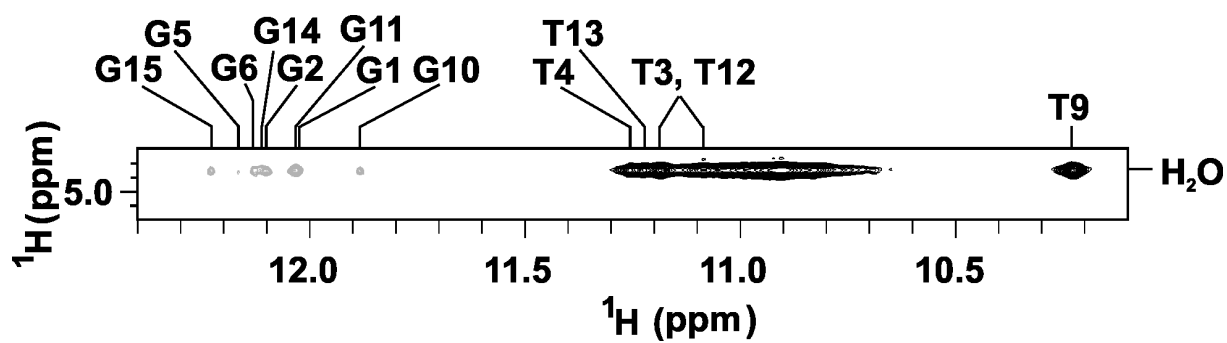

**Figure S2.** Region of ROESY spectrum of TBA with mixing time of 40 ms in the presence of one molar equivalent of KCl with respect to oligonucleotide at 1.9 mM concentration, 5%  $^2\text{H}_2\text{O}$ , 15 °C and pH 5.0. Imino proton assignments are shown on the top.
